# Supplementary material
Source: HighWire-hosted journal article supplement (https://bmjopen.bmj.com/content/8/3/e019790)
Supplement: inline-supplementary-material-1 [file inline-supplementary-material-1.pdf]

ADDITIONAL TABLE A3. Consultation times for patients seen in general cardiology clinics (A) Using the PowerForm and SmartTemplate (B) Using paper-based consultation and dictated clinic letter.

|  | (A) SmartTemplate |                                      | (B) Dictated Clinic Letter |                                      |
|--|-------------------|--------------------------------------|----------------------------|--------------------------------------|
|  | Patient           | Consultation Time (minutes: seconds) | Patient                    | Consultation Time (minutes: seconds) |
|  | 1                 | 11:03                                | 1                          | 14:07                                |
|  | 2                 | 15:03                                | 2                          | 18:48                                |
|  | 3                 | 23:26                                | 3                          | 15:57                                |
|  | 4                 | 14:41                                | 4                          | 11:33                                |
|  | 5                 | 10:22                                | 5                          | 12:57                                |
|  | 6                 | 15:21                                | 6                          | 13:59                                |
|  | 7                 | 14:36                                | 7                          | 19:14                                |
|  | 8                 | 11:28                                | 8                          | 15:27                                |
|  | 9                 | 14:41                                | 9                          | 11:12                                |
|  | 10                | 16:53                                | 10                         | 10:48                                |
|  | 11                | 11:21                                | 11                         | 10:11                                |
|  | 12                | 12:02                                | 12                         | 12:38                                |
|  | 13                | 08:29                                | 13                         | 13:36                                |
|  | 14                | 12:28                                | 14                         | 13:26                                |
|  | 15                | 20:01                                | 15                         | 12:41                                |
|  | 16                | 14:16                                | 16                         | 21:13                                |
|  | 17                | 12:34                                | 17                         | 12:05                                |
|  | 18                | 12:35                                | 18                         | 16:27                                |
|  | 19                | 11:36                                | 19                         | 10:53                                |
|  | 20                | 19:27                                | 20                         | 14:09                                |
|  | 21                | 11:26                                | 21                         | 13:50                                |
|  | 22                | 13:34                                | 22                         | 17:43                                |

|                        |  |       |  |       |
|------------------------|--|-------|--|-------|
| Mean consultation time |  | 13:58 |  | 14:13 |
| Standard deviation     |  | 03:30 |  | 02:57 |
