# Supplementary material
Source: HighWire-hosted journal article supplement (https://bmjopen.bmj.com/content/8/3/e019790)
Supplement: inline-supplementary-material-2 [file inline-supplementary-material-2.pdf]

ADDITIONAL TABLE A1. Responses to GP questionnaires

| Questions (posed to 93 GPs)                                                                                                                                                                                                           | Cardiac outpatient report questionnaire for GPs |                             |                           |                             |                            |
|---------------------------------------------------------------------------------------------------------------------------------------------------------------------------------------------------------------------------------------|-------------------------------------------------|-----------------------------|---------------------------|-----------------------------|----------------------------|
| How many GPs work in your practice? (93 responses)                                                                                                                                                                                    | <b>0-1</b>                                      | <b>2-4</b>                  | <b>5+</b>                 |                             |                            |
|                                                                                                                                                                                                                                       | 3                                               | 34                          | 56                        |                             |                            |
|                                                                                                                                                                                                                                       | 3.2%                                            | 36.6%                       | 60.2%                     |                             |                            |
| The patient is presented with a copy of the Outpatient Report on leaving the cardiac outpatient department. How important do you think this is? (93 responses)                                                                        | <b>Not at all important</b>                     | <b>Slightly important</b>   | <b>Somewhat important</b> | <b>Very important</b>       | <b>Extremely important</b> |
|                                                                                                                                                                                                                                       | 0                                               | 0                           | 15                        | 48                          | 30                         |
|                                                                                                                                                                                                                                       | 0.0%                                            | 0.0%                        | 16.1%                     | 51.6%                       | 32.3%                      |
| The Outpatient Report is transmitted electronically to the patient's EMIS file immediately after the consultation. How important do you think same-day delivery of the Outpatient Report is? (89 responses)                           | <b>Not at all important</b>                     | <b>Slightly important</b>   | <b>Somewhat important</b> | <b>Very important</b>       | <b>Extremely important</b> |
|                                                                                                                                                                                                                                       | 0                                               | 4                           | 10                        | 34                          | 41                         |
|                                                                                                                                                                                                                                       | 0.0%                                            | 4.5%                        | 11.2%                     | 38.2%                       | 46.1%                      |
| The SNOMED codes used in the Outpatient Report will permit the transfer of data directly into the relevant EMIS fields. How useful do you think this will be? (92 responses)                                                          | <b>Not at all useful</b>                        | <b>Slightly useful</b>      | <b>Somewhat useful</b>    | <b>Very useful</b>          | <b>Extremely useful</b>    |
|                                                                                                                                                                                                                                       | 1                                               | 2                           | 9                         | 37                          | 43                         |
|                                                                                                                                                                                                                                       | 1.1%                                            | 2.2%                        | 9.8%                      | 40.2%                       | 46.7%                      |
| Is the layout of the Outpatient Report easy to follow? (89 responses)                                                                                                                                                                 | <b>Yes</b>                                      | <b>No</b>                   | <b>Somewhat</b>           |                             |                            |
|                                                                                                                                                                                                                                       | 74                                              | 2                           | 13                        |                             |                            |
|                                                                                                                                                                                                                                       | 83.1%                                           | 2.2%                        | 14.6%                     |                             |                            |
| Does the content of the Outpatient Report provide adequate information for your clinical needs? (92 responses)                                                                                                                        | <b>Yes</b>                                      | <b>No</b>                   | <b>Somewhat</b>           |                             |                            |
|                                                                                                                                                                                                                                       | 69                                              | 5                           | 18                        |                             |                            |
|                                                                                                                                                                                                                                       | 75.0%                                           | 5.4%                        | 19.6%                     |                             |                            |
| The Outpatient Report provides a list of investigations and medications that a patient will receive after their clinic appointment. How useful do you think these sections are for your further follow up of patients? (88 responses) | <b>Not at all useful</b>                        | <b>Slightly useful</b>      | <b>Somewhat useful</b>    | <b>Very useful</b>          | <b>Extremely useful</b>    |
|                                                                                                                                                                                                                                       | 0                                               | 0                           | 6                         | 35                          | 47                         |
|                                                                                                                                                                                                                                       | 0.0%                                            | 0.0%                        | 6.8%                      | 39.8%                       | 53.4%                      |
| How would you rate the utility of this new Outpatient Report compared with the conventional typed letter posted to your practice? (93 responses)                                                                                      | <b>Much less useful</b>                         | <b>Somewhat less useful</b> | <b>Comparable</b>         | <b>Somewhat more useful</b> | <b>Much more useful</b>    |
|                                                                                                                                                                                                                                       | 3                                               | 3                           | 17                        | 19                          | 51                         |
|                                                                                                                                                                                                                                       | 3.2%                                            | 3.2%                        | 18.3%                     | 20.4%                       | 54.8%                      |
