# Supplementary material
Source: HighWire-hosted journal article supplement (https://bmjopen.bmj.com/content/8/3/e019790)
Supplement: inline-supplementary-material-3 [file inline-supplementary-material-3.pdf]

ADDITIONAL TABLE A2. Responses to patient questionnaires

| <b>Questions (posed to 53 Patients)</b>                                                                                                                      | <b>Cardiac outpatient report questionnaire for patients</b> |                             |                           |                             |                            |
|--------------------------------------------------------------------------------------------------------------------------------------------------------------|-------------------------------------------------------------|-----------------------------|---------------------------|-----------------------------|----------------------------|
| Which age group are you a part of? (53 responses)                                                                                                            | <b>16-35</b>                                                | <b>36-55</b>                | <b>56-75</b>              | <b>76+</b>                  | <b>Prefer not to say</b>   |
|                                                                                                                                                              | 7                                                           | 14                          | 24                        | 8                           | 0                          |
|                                                                                                                                                              | 13.2%                                                       | 26.4%                       | 45.3%                     | 15.1%                       | 0.0%                       |
| What is your gender? (53 responses)                                                                                                                          | <b>Male</b>                                                 | <b>Female</b>               | <b>Prefer not to say</b>  |                             |                            |
|                                                                                                                                                              | 26                                                          | 27                          | 0                         |                             |                            |
|                                                                                                                                                              | 49.1%                                                       | 50.9%                       | 0.0%                      |                             |                            |
| As a patient, you are given a copy of the Outpatient Report on leaving the cardiac outpatient department. How important do you think this is? (53 responses) | <b>Not at all important</b>                                 | <b>Slightly important</b>   | <b>Somewhat important</b> | <b>Very important</b>       | <b>Extremely important</b> |
|                                                                                                                                                              | 1                                                           | 0                           | 3                         | 29                          | 20                         |
|                                                                                                                                                              | 1.9%                                                        | 0.0%                        | 5.7%                      | 54.7%                       | 37.7%                      |
| Is the layout of the Outpatient Report easy to follow? (53 responses)                                                                                        | <b>Yes</b>                                                  | <b>No</b>                   | <b>Somewhat</b>           |                             |                            |
|                                                                                                                                                              | 52                                                          | 0                           | 1                         |                             |                            |
|                                                                                                                                                              | 98.1%                                                       | 0.0%                        | 1.9%                      |                             |                            |
| How would you rate this new Outpatient Report compared with the conventional typed letter posted to your home? (53 responses)                                | <b>Much less useful</b>                                     | <b>Somewhat less useful</b> | <b>Comparable</b>         | <b>Somewhat more useful</b> | <b>Much more useful</b>    |
|                                                                                                                                                              | 0                                                           | 0                           | 4                         | 12                          | 37                         |
|                                                                                                                                                              | 0.0%                                                        | 0.0%                        | 7.5%                      | 22.6%                       | 69.8%                      |
| Do you think this Outpatient Report will help you to understand your medical condition? (53 responses)                                                       | <b>Yes</b>                                                  | <b>No</b>                   | <b>Somewhat</b>           |                             |                            |
|                                                                                                                                                              | 49                                                          | 1                           | 3                         |                             |                            |
|                                                                                                                                                              | 92.5%                                                       | 1.9%                        | 5.7%                      |                             |                            |
| Does the Outpatient Report help you understand the follow up you will receive after your consultation? (53 responses)                                        | <b>Yes</b>                                                  | <b>No</b>                   | <b>Somewhat</b>           |                             |                            |
|                                                                                                                                                              | 49                                                          | 3                           | 1                         |                             |                            |
|                                                                                                                                                              | 92.5%                                                       | 5.7%                        | 1.9%                      |                             |                            |
